# Supplementary material for: Efficient light trapping of quasi-inverted nanopyramids in ultrathin c-Si through a cost-effective wet chemical method
Source: Royal Society of Chemistry journal article supplement (doi:10.1039/c6ra19819h), 2016-01-01
Supplement: c6ra19819h1.pdf [file c6ra19819h1.pdf]

### Supplementary information

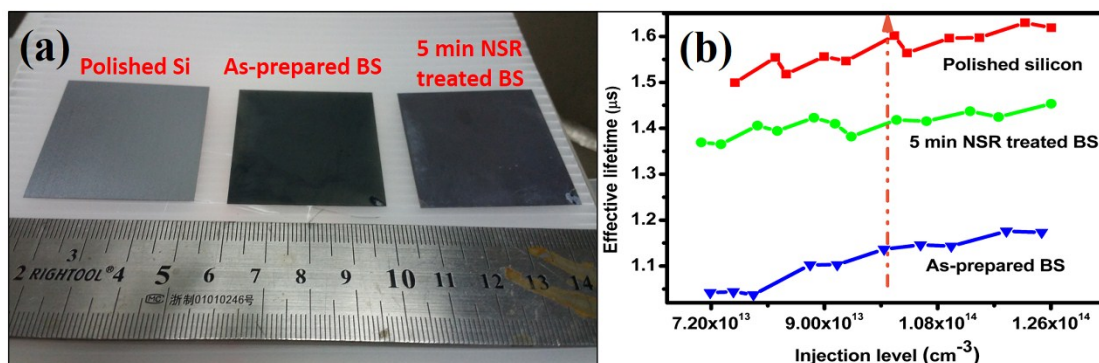

**Fig.S1.** (a) Typical macro pictures of different samples before ALD  $\text{Al}_2\text{O}_3$  passivation and (b) Effective minority carrier lifetime of different samples before ALD  $\text{Al}_2\text{O}_3$  passivation as a function of injection level.

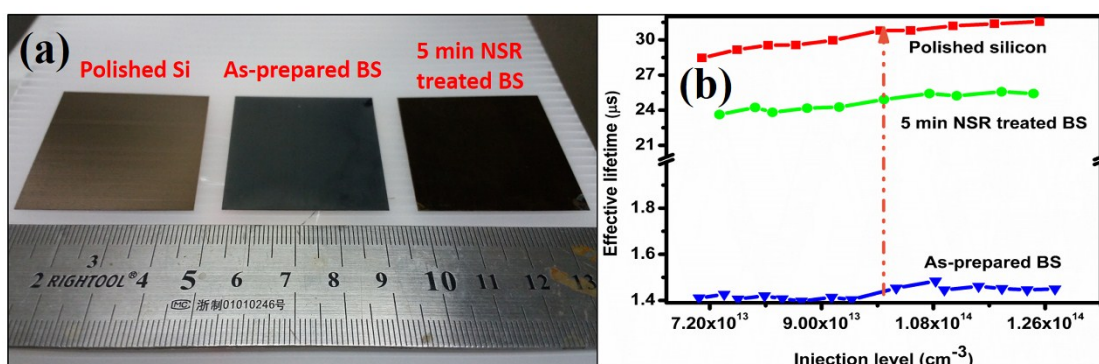

**Fig.S2.** (a) Typical macro pictures of different samples after ALD  $\text{Al}_2\text{O}_3$  passivation and (b) Effective minority carrier lifetime of different samples after ALD  $\text{Al}_2\text{O}_3$  passivation as a function of injection level.
